# Supplementary material for: Trends in the incidence and mortality of legionellosis in Japan: a nationwide observational study, 1999–2017
Source: PubMed Central journal article supplement (PMC8012643; doi:10.1038/s41598-021-86431-8), 2021-03-31

Title:

Trends in the Incidence and Mortality of Legionellosis in Japan: A Nationwide Observational Study, 1999–2017

**Authors and affiliations:**

Shinnosuke Fukushima, MD <sup>1)</sup>, Hideharu Hagiya, MD, Ph.D. <sup>1)\*</sup>, Yuki Otsuka, MD <sup>1)</sup>, Toshihiro Koyama, Ph.D. <sup>2)</sup>, Fumio Otsuka, MD, Ph.D. <sup>1)</sup>

1) Department of General Medicine, Okayama University Graduate School of Medicine, Dentistry and Pharmaceutical Sciences, 2-5-1 Shikata-cho, Kitaku, Okayama, 700-8558

2) Department of Pharmaceutical Biomedicine, Graduate School of Medicine, Dentistry, and Pharmaceutical Sciences, Okayama University, 1-1-1 Tsushima-Naka, Kita-ku, Okayama, 700-8530, Japan

**\*Corresponding Author:**

Hideharu Hagiya, MD, PhD

Department of General Medicine, Okayama University Graduate School of Medicine, Dentistry and Pharmaceutical Sciences, 2-5-1 Shikata-cho, Kitaku, Okayama, 700-8558

TEL: +81-86-235-7342; FAX: +81-86-235-7345

E-mail: hagiya@okayama-u.ac.jp

**Supplementary Table S1. Mean incidence rate (per 100,000 population) and annual percentage change of legionellosis across 47 prefectures in Japan, 1999–2017**

|           | Incidence | APC [95% CI]        |
|-----------|-----------|---------------------|
| Hokkaido* | 0.69      | 10.0 [0.3, 20.7]    |
| Aomori    | 0.48      | 22.0 [-13.8, 72.7]  |
| Iwate     | 1.33      | 11.8 [-27.7, 72.7]  |
| Miyagi    | 1.81      | -2.7 [-36.9, 49.9]  |
| Akita     | 1.41      | 16.5 [-48.5, 163.5] |
| Yamagata  | 1.37      | -1.2 [-15.3, 15.4]  |
| Fukushima | 1.21      | 18.3 [-7.3, 51.0]   |
| Ibaraki   | 1.55      | 9.9 [-16.8, 45.2]   |
| Tochigi   | 1.65      | 10.9 [-17.2, 48.4]  |
| Gunma     | 1.78      | 18.8 [-15.8, 67.6]  |
| Saitama*  | 1.03      | 21.6 [0.3, 47.4]    |
| Chiba     | 1.06      | 3.2 [-8.4, 16.3]    |
| Tokyo     | 0.95      | 15.2 [-1.4, 34.7]   |
| Kanagawa  | 1.24      | 4.7 [-25.8, 47.7]   |
| Niigata   | 1.62      | -0.5 [-14.1, 15.2]  |
| Toyama    | 3.49      | 1.1 [-10.9, 14.8]   |
| Ishikawa  | 2.81      | -1.3 [-25.4, 30.6]  |
| Fukui     | 2.04      | 23.2 [-26.7, 106.8] |
| Yamanashi | 0.94      | 13.6 [-30.6, 86.0]  |
| Nagano*   | 1.67      | 11.1 [4.8, 17.9]    |
| Gifu*     | 1.30      | 24.7 [2.0, 52.3]    |
| Shizuoka* | 1.22      | 16.6 [5.4, 28.9]    |
| Aichi     | 1.13      | 13.8 [-2.1, 32.3]   |
| Mie       | 1.17      | 9.9 [-3.5, 25.1]    |
| Shiga     | 1.57      | 7.9 [-20.0, 45.5]   |
| Kyoto     | 1.02      | 11.3 [-21.6, 57.8]  |
| Osaka     | 0.85      | 7.1 [-0.7, 15.6]    |
| Hyogo*    | 1.07      | 14.7 [5.4, 24.9]    |

|            |      |                     |
|------------|------|---------------------|
| Nara       | 0.87 | 10.9 [-16.7, 47.5]  |
| Wakayama   | 0.92 | 27.7 [-3.6, 69.2]   |
| Tottori    | 1.08 | -0.4 [-26.0, 34.1]  |
| Shimane    | 0.81 | -7.4 [-39.7, 42.0]  |
| Okayama    | 1.46 | 2.3 [-10.0, 16.2]   |
| Hiroshima  | 1.73 | 40.1 [-5.7, 108.2]  |
| Yamaguchi  | 0.89 | 15.9 [-1.7, 36.6]   |
| Tokushima* | 0.93 | 64.5 [11.5, 142.7]  |
| Kagawa     | 0.94 | 2.1 [-47.5, 98.6]   |
| Ehime      | 0.93 | 15.2 [-25.9, 79.0]  |
| Kochi      | 0.52 | 21.4 [-9.8, 63.6]   |
| Fukuoka    | 0.82 | 11.5 [-1.1, 25.6]   |
| Saga       | 0.46 | -15.9 [-56.5, 62.8] |
| Nagasaki   | 0.79 | 18.6 [-12.5, 60.8]  |
| Kumamoto   | 1.40 | 21.3 [-20.6, 85.3]  |
| Oita       | 1.25 | 1.7 [-21.1, 31.1]   |
| Miyazaki   | 0.65 | -6.0 [-47.6, 68.5]  |
| Kagoshima  | 0.53 | 21.7 [-48.4, 186.7] |
| Okinawa    | 1.13 | 0.4 [-25.9, 35.9]   |

\*Prefecture with a significantly increasing trend.

CI, confidence interval.

**Supplementary Figure S1. Trends in the number and the fatal cases by sex and age category, 1999–2017**

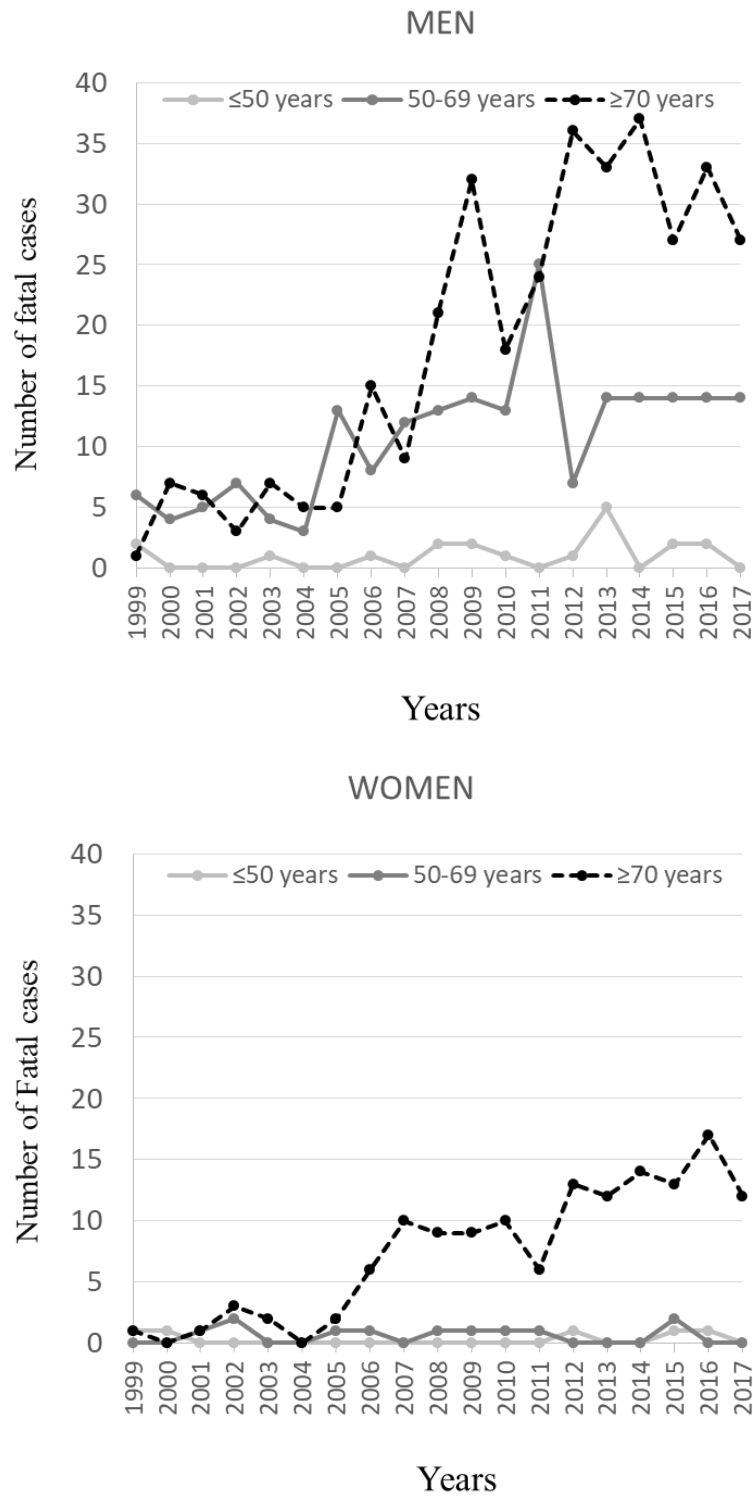

Supplement: 41598_2021_86431_MOESM1_ESM.pdf [file 41598_2021_86431_MOESM1_ESM.pdf]
